# Supplementary material for: Visible sensing of conformational transition in model silk peptides based on a gold nanoparticles indicator
Source: Royal Society of Chemistry journal article supplement (doi:10.1039/c9ra05842g), 2019-01-01
Supplement: c9ra05842g1.pdf [file c9ra05842g1.pdf]

## Electronic Supplementary Information

### Visible sensing of conformational transition in model silk peptides based on gold nanoparticles indicator

Lan Jia<sup>a\*</sup>, Jiabing Zhang<sup>b</sup>, SuMei Liu<sup>a</sup>, Song Chen<sup>a\*</sup>, Jingxin Zhu<sup>a</sup>

<sup>a</sup> Key laboratory of interface science and engineering in advanced materials, ministry of education, College of Material Science and Engineering, Taiyuan University of Technology, Taiyuan, 030024, P. R. China

<sup>b</sup> Department Pharmacy and Machinery, China Railway 12<sup>th</sup> Bureau Group Central Hospital, Taiyuan, 030024, P. R. China

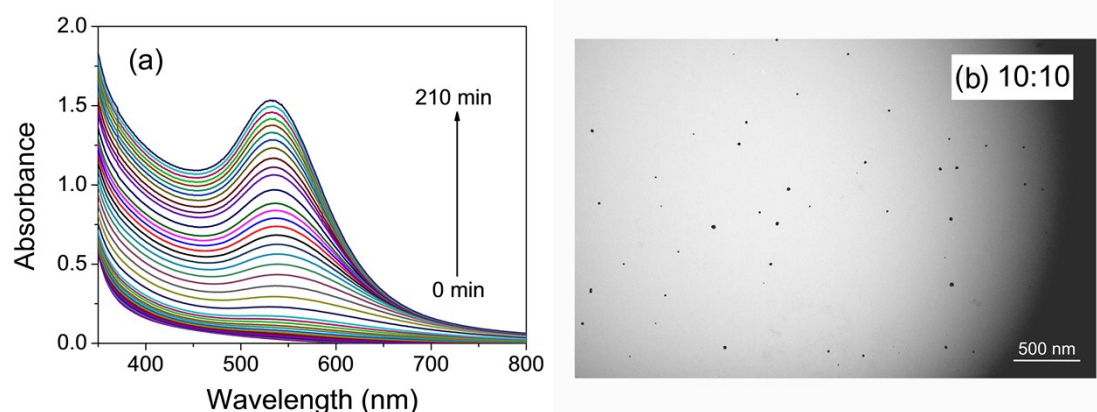

Fig. 1(a) The UV-Vis spectra of GY-14@Au NPs during the preparation process; (b) The TEM image of prepared GY-14@Au NPs.

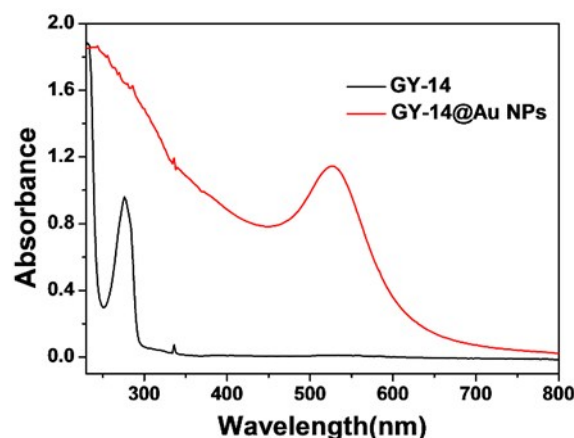

Fig. 2 The UV-Vis spectra of GY-14 before and after Au NPs reduction process.

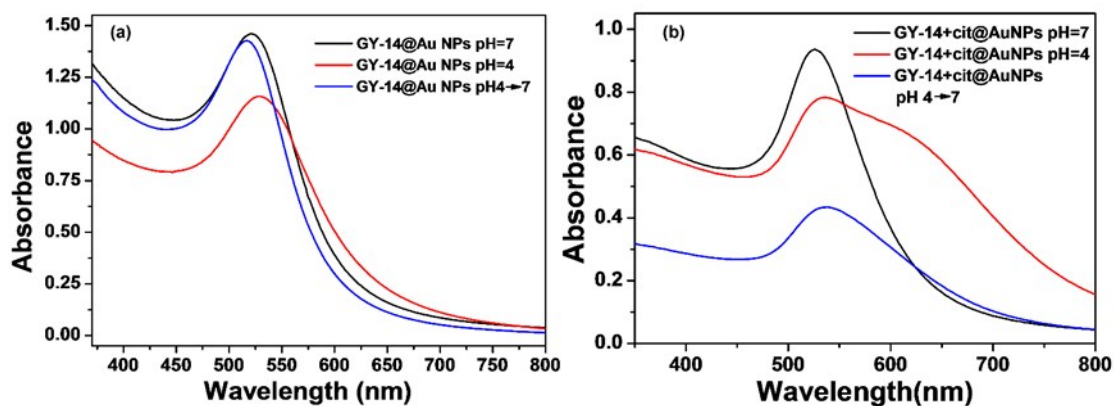

Fig. 3 The UV-Vis spectra of (a) GY-14@Au NPs and (b) GY-14+cit@Au NPs at different pH conditions.

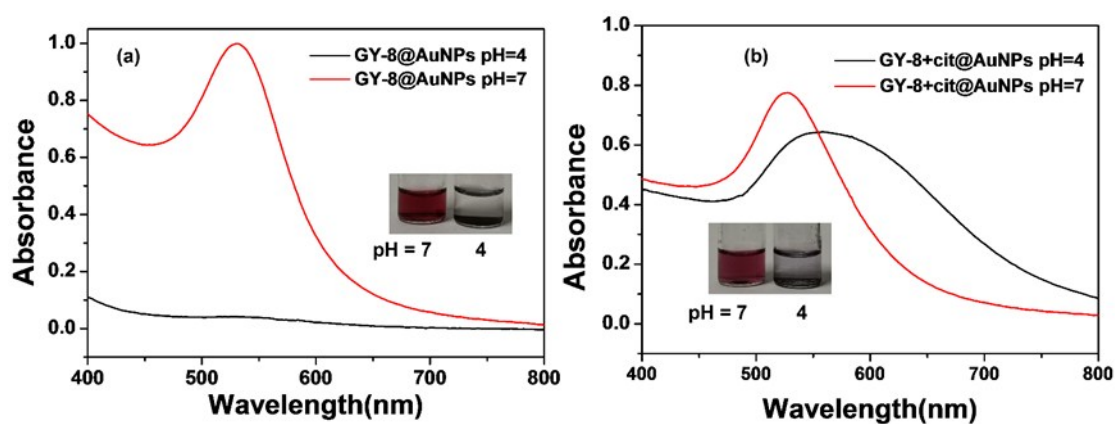

Fig. 4 The UV-Vis spectra of (a) GY-8@Au NPs and (b) GY-8+cit@Au NPs after 2h at different pH conditions.

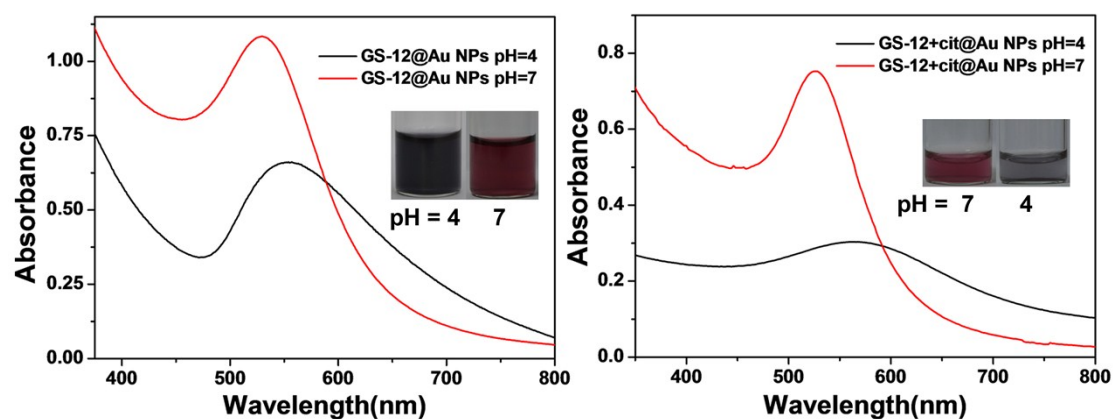

Fig. 5 The UV-Vis spectra of (a) GS-12@Au NPs and (b) GS-12+cit@Au NPs at different pH conditions.

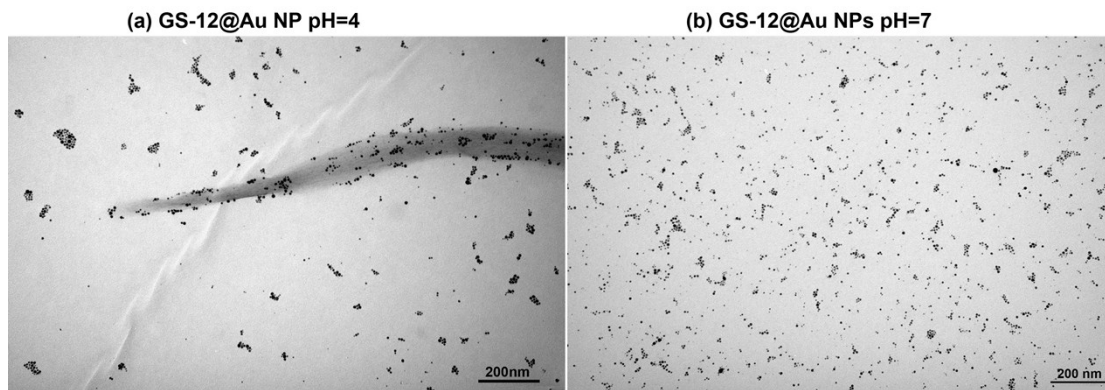

Fig. 6 The TEM image of (a) GS-12@Au NPs and (b) GS-12+cit@Au NPs at different pH conditions.

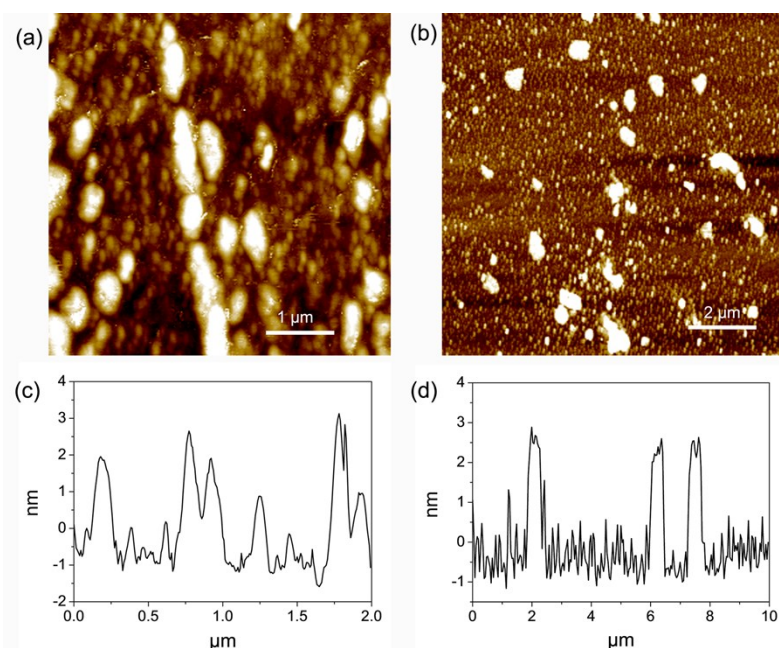

Fig.7 The AFM images and height analysis results of GY-14 at pH 4(a), (c) and pH 7(b), (d).

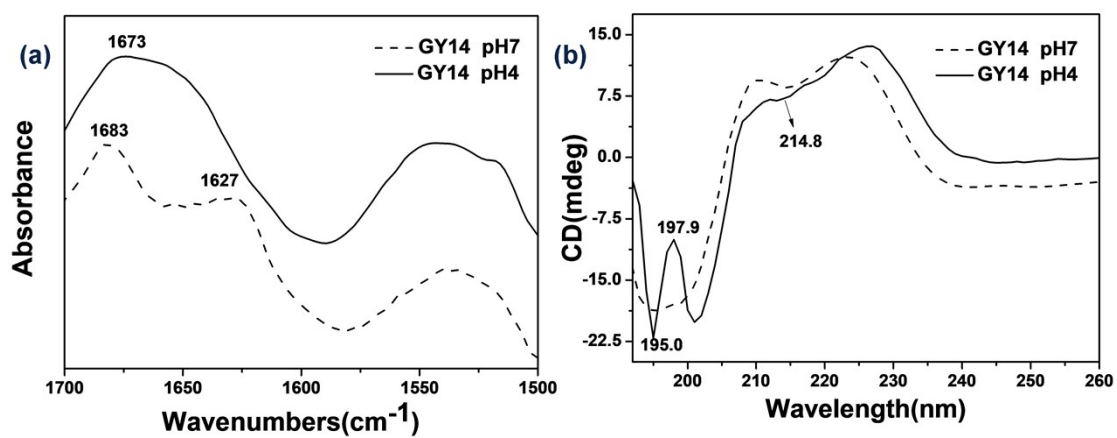

Fig.8 FTIR spectra (a) and CD spectra (b) of GY-14 at different pH conditions.

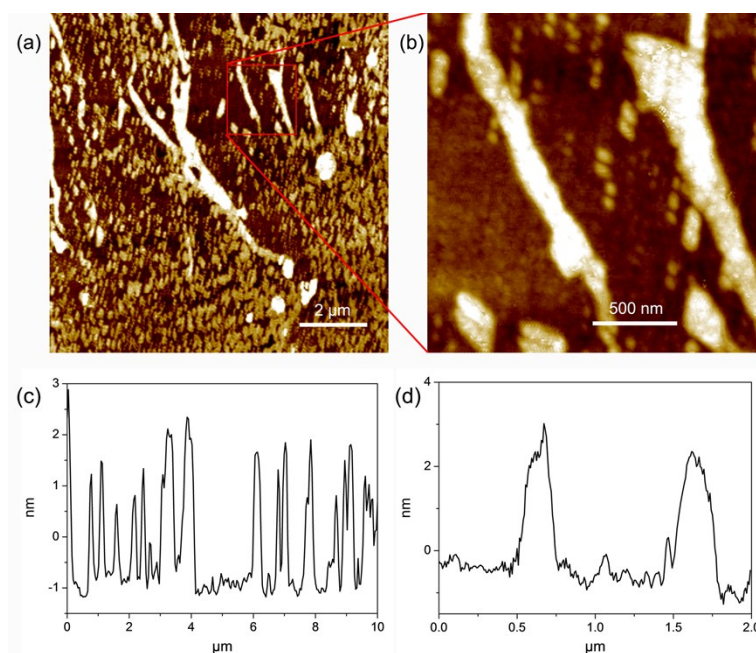

Fig.9 The AFM images and height analysis results of GY-14 with 10 mM  $\text{Ca}^{2+}$  ions (a), (c) and the magnified image (b), (d).

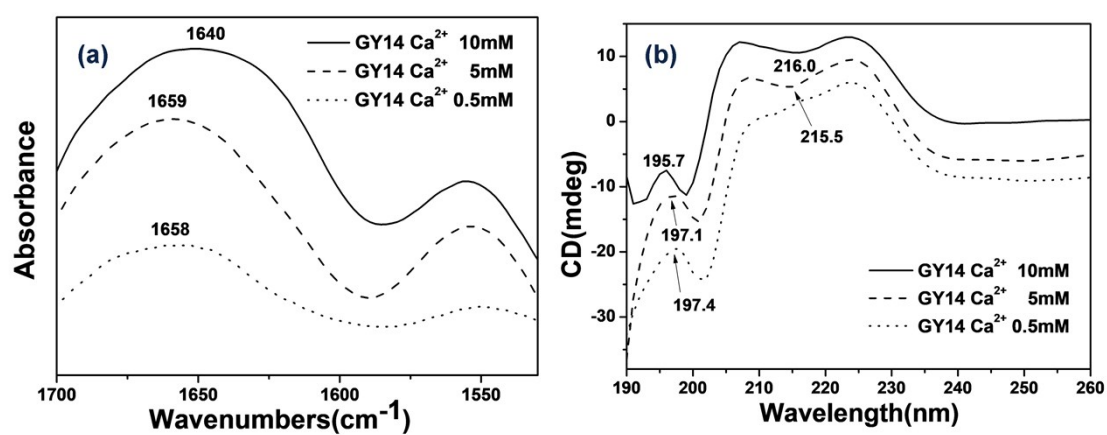

Fig.10 FTIR spectra (a) and CD spectra (b) of GY-14 with different concentration of  $\text{Ca}^{2+}$ .

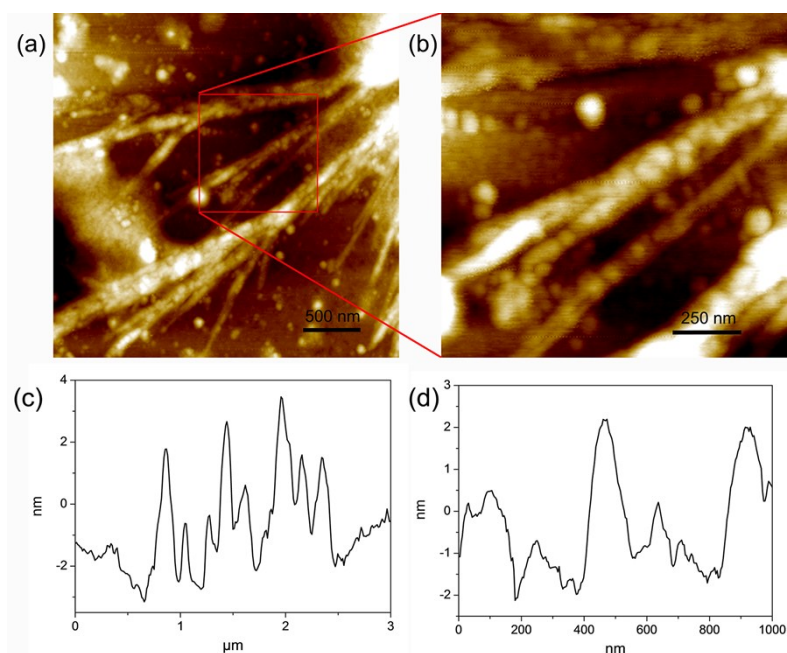

Fig.11 The AFM images and height analysis results of GY-14 induced by isopropanol solution (90%) (a), (c) and the magnified image (b), (d).
